# Supplementary material for: Association Between Insomnia, Stress Events, and Other Psychosocial Factors and Incident Atrial Fibrillation in Postmenopausal Women: Insights From the Women's Health Initiative
Source: PubMed Central journal article supplement — J Am Heart Assoc. 2023 Aug 30;12(17):e030030. doi: 10.1161/JAHA.123.030030 (PMC10547347; doi:10.1161/jaha.123.030030), 2023-08-30
Supplement: JAH3-12-e030030-s001.pdf [file JAH3-12-e030030-s001.pdf]

# **SUPPLEMENTAL MATERIAL**

**Table S1. Rationale, contents, and references for the eight psychosocial constructs used in this study.**

| Name of Psychosocial construct | contents                                                                                                                                                                                                                                                 | Measurement                                                                                                                                                                                                                                     | References |
|--------------------------------|----------------------------------------------------------------------------------------------------------------------------------------------------------------------------------------------------------------------------------------------------------|-------------------------------------------------------------------------------------------------------------------------------------------------------------------------------------------------------------------------------------------------|------------|
| Optimism                       | Optimism was represented by a cluster of constructs, including perceived control, positive expectations, empowerment, fighting spirit, and lack of helplessness.                                                                                         | Optimism was measured using a Life Orientation Test-Revised, a six-item scale that appeared as Items 20-25 on Women's Health Initiative (WHI) questionnaire Form 37.                                                                            | 50         |
| Social Support                 | Participants were asked to indicate how often each of the nine different types of social support was available to them.                                                                                                                                  | Responses to the nine questions on Form 37 (Items 1-9) were scored on a five-point scale ranging from “none of the time” to “all of the time.”                                                                                                  | 51         |
| Social Strain                  | Social strain is often called “negative social support.”                                                                                                                                                                                                 | Social strain was measured by Items 16-19 on Form 37. Responses to each item could range from 1 (none) to 5 (all). Responses were summed to yield a social strain score ranging from 4-20, with higher scores indicating greater social strain. | 45, 46, 52 |
| Stressful life events          | Stressful life events were assessed by asking study participants 11 major life events occurring over the previous year:<br><ul style="list-style-type: none"> <li>a. did your spouse or partner die?</li> <li>b. Did a close friend or family</li> </ul> | Stressful life events were measured by Items 91, 93-102 on Form 37. The total score ranges from 0 to 33, with higher scores representing greater number and severity of upsetting events.                                                       | 45, 46, 52 |

|  |                                                                                                                                                                                                                                                                                                                                                                                                                                                                                                                                                                                            |  |  |
|--|--------------------------------------------------------------------------------------------------------------------------------------------------------------------------------------------------------------------------------------------------------------------------------------------------------------------------------------------------------------------------------------------------------------------------------------------------------------------------------------------------------------------------------------------------------------------------------------------|--|--|
|  | <p>member die or have a serious illness (other than your spouse or partner?)</p> <ul style="list-style-type: none"><li>c. Did you have major problems with money?</li><li>d. Did you have a divorce or break up with a spouse or partner?</li><li>e. Did a family member or close friend have a divorce or break-up?</li><li>f. Did you have a major conflict with children or grandchildren?</li><li>g. Did you have any major accidents, disasters, muggings, unwanted sexual experiences, robberies, or similar events?</li><li>h. Did you or a family member or close friend</li></ul> |  |  |
|--|--------------------------------------------------------------------------------------------------------------------------------------------------------------------------------------------------------------------------------------------------------------------------------------------------------------------------------------------------------------------------------------------------------------------------------------------------------------------------------------------------------------------------------------------------------------------------------------------|--|--|

|                   |                                                                                                                                                                                                                                                                                                                                                                                                                                                  |                                                                               |        |
|-------------------|--------------------------------------------------------------------------------------------------------------------------------------------------------------------------------------------------------------------------------------------------------------------------------------------------------------------------------------------------------------------------------------------------------------------------------------------------|-------------------------------------------------------------------------------|--------|
|                   | <p>lose their job or retire?</p> <p>i. Were you physically abused by being hit, slapped, pushed, shoved, punched or threatened with a weapon by a family member or close friend?</p> <p>j. Were you verbally abused by being made fun of, severely criticized, told you were a stupid or worthless person, or threatened with harm to yourself, your possessions, or your pets, by a family member or close friend?</p> <p>k. Did a pet die?</p> |                                                                               |        |
| Cynical hostility | The relationship between hostility and cardiovascular disease has been demonstrated                                                                                                                                                                                                                                                                                                                                                              | Hostility was measured using the 13-item cynicism subscale of the Cook-Medley | 53, 54 |

|                          |                                                                                                                                                                       |                                                                                                                                                                                                                                                                                                                                                                                                                                    |        |
|--------------------------|-----------------------------------------------------------------------------------------------------------------------------------------------------------------------|------------------------------------------------------------------------------------------------------------------------------------------------------------------------------------------------------------------------------------------------------------------------------------------------------------------------------------------------------------------------------------------------------------------------------------|--------|
|                          | in a variety of studies.                                                                                                                                              | Questionnaire as Items 33-45 on Form 37. Higher scores on the scale indicate greater levels of hostility.                                                                                                                                                                                                                                                                                                                          |        |
| Emotional expressiveness | Emotional expressiveness included 2 measures: negative emotional expressiveness (NEE) and Ambivalence over Emotional expressiveness (AEE).                            | Emotional expressiveness was assessed by the Ambivalence Over Emotional Expression Questionnaire and Emotional Expressiveness Questionnaire, and included as Items 26-32 on Form 37 (NEE: item 26-29; AEE: item 30-32).                                                                                                                                                                                                            | 55, 56 |
| Insomnia                 | Insomnia was assessed by the 5-item Women's Health Initiative Insomnia Rating Scale (WHIIR), which has been previously validated.                                     | The five questions were (Items 114-119 of Form 37): did you have trouble falling asleep? Did you wake up several times at night? Did you wake up earlier than you planned? Did you have trouble getting back to sleep after you woke up too early? Overall, was your typical night's sleep during the past 4 weeks: 1="very restless" to 5="very sound or restful." Score scale: 0 - 20; a higher score indicated greater Insomnia | 57, 58 |
| Depressive symptoms      | Depressive symptoms were assessed by a brief screening test for depression and mood disorders that has been validated to be a valid and reliable measure of depressed | There were nine items taken from the medical outcome study, Short Form 36, as Items 103-110.1 on Form 37.                                                                                                                                                                                                                                                                                                                          | 59, 60 |

|  |       |  |  |
|--|-------|--|--|
|  | mood. |  |  |
|--|-------|--|--|

**Table S2. Pearson statistics (R) and their corresponding *p*-values of correlation between standardized psychosocial constructs with and within their respective clusters.**

| <b>Stress Cluster</b>       | <i>Stress Cluster</i>   | Stressful Life events   | Depressive symptoms     |                         |                         |
|-----------------------------|-------------------------|-------------------------|-------------------------|-------------------------|-------------------------|
| Stressful life events       | 0.69<br><i>p</i> <0.001 |                         |                         |                         |                         |
| Depressive symptoms         | 0.82<br><i>p</i> <0.001 | 0.36<br><i>p</i> <0.001 |                         |                         |                         |
| Insomnia                    | 0.73<br><i>p</i> <0.001 | 0.18<br><i>p</i> <0.001 | 0.47<br><i>p</i> <0.001 |                         |                         |
| <b>Strain Cluster</b>       | <i>Strain Cluster</i>   | Optimism*               | Social support*         | Social strain           | Cynical hostility       |
| Optimism <sup>1</sup>       | 0.68<br><i>p</i> <0.001 |                         |                         |                         |                         |
| Social support <sup>1</sup> | 0.61<br><i>p</i> <0.001 | 0.32<br><i>p</i> <0.001 |                         |                         |                         |
| Social strain               | 0.65<br><i>p</i> <0.001 | 0.25<br><i>p</i> <0.001 | 0.28<br><i>p</i> <0.001 |                         |                         |
| Cynical hostility           | 0.66<br><i>p</i> <0.001 | 0.30<br><i>p</i> <0.001 | 0.24<br><i>p</i> <0.001 | 0.30<br><i>p</i> <0.001 |                         |
| Emotional expressiveness    | 0.58<br><i>p</i> <0.001 | 0.28<br><i>p</i> <0.001 | 0.09<br><i>p</i> <0.001 | 0.21<br><i>p</i> <0.001 | 0.24<br><i>p</i> <0.001 |

\*Standardized psychosocial stressor values are inverted

**Table S3. Univariate and Multivariate-adjusted hazard ratios of cluster quartiles on incident atrial fibrillation.**

| Model      | Stress Cluster    |                  | Strain Cluster    |                  |
|------------|-------------------|------------------|-------------------|------------------|
|            | HR (95% CI)       | <i>p</i> -value* | HR (95% CI)       | <i>p</i> -value* |
| Unadjusted |                   | <0.001           |                   | <0.001           |
| Quartile 1 | 1.00 (ref)        |                  | 1.00 (ref)        |                  |
| Quartile 2 | 1.08 (1.04, 1.12) |                  | 1.00 (0.96, 1.04) |                  |
| Quartile 3 | 1.12 (1.08, 1.16) |                  | 1.04 (1.01, 1.08) |                  |
| Quartile 4 | 1.17 (1.13, 1.22) |                  | 1.06 (1.02, 1.10) |                  |
| Model 1    |                   | <0.001           |                   | <0.001           |
| Quartile 1 | 1.00 (ref)        |                  | 1.00 (ref)        |                  |
| Quartile 2 | 1.06 (1.02, 1.10) |                  | 1.00 (0.96, 1.04) |                  |
| Quartile 3 | 1.09 (1.05, 1.13) |                  | 1.04 (1.01, 1.08) |                  |
| Quartile 4 | 1.19 (1.14, 1.23) |                  | 1.08 (1.04, 1.13) |                  |
| Model 2    |                   | <0.001           |                   | 0.003            |
| Quartile 1 | 1.00 (ref)        |                  | 1.00 (ref)        |                  |
| Quartile 2 | 1.05 (1.01, 1.09) |                  | 0.99 (0.96, 1.03) |                  |
| Quartile 3 | 1.09 (1.05, 1.13) |                  | 1.03 (0.99, 1.07) |                  |
| Quartile 4 | 1.17 (1.12, 1.21) |                  | 1.05 (1.01, 1.09) |                  |
| Model 3    |                   | <0.001           |                   | 0.03             |
| Quartile 1 | 1.00 (ref)        |                  | 1.00 (ref)        |                  |
| Quartile 2 | 1.04 (1.00, 1.08) |                  | 0.99 (0.95, 1.03) |                  |
| Quartile 3 | 1.07 (1.03, 1.11) |                  | 1.02 (0.99, 1.06) |                  |
| Quartile 4 | 1.14 (1.10, 1.19) |                  | 1.03 (1.00, 1.08) |                  |

Hazard ratios (HRs) and confidence intervals (CIs) are from a proportional hazards model with incident atrial fibrillation (AF) as a function of Stress Cluster and Strain Cluster quartiles.

Stress Cluster: Stressful life events, depressive symptoms, insomnia

Strain Cluster: Optimism, social support, social strain, cynical hostility, emotional expressiveness

All models are stratified by Women's Health Initiative component (clinical trial/observational study)

Model 1: Adjusted for age, ethnicity, race, and education

Model 2: Model 1 + waist-hip ratio, physical activity, smoking, alcohol

Model 3: Model 2 + hypertension, diabetes, heart failure, myocardial infarction

\**p*-value tests from a separate proportional hazards model with incident AF as a function of linear trend over cluster quartiles.



**Table S4. Hazard ratios of the two psychosocial clusters on incident atrial fibrillation, as stratified by baseline subgroups.**

| Subgroup                    | Incident atrial fibrillation |        |          | Stress Cluster    |                              | Strain Cluster    |                              |
|-----------------------------|------------------------------|--------|----------|-------------------|------------------------------|-------------------|------------------------------|
|                             | n                            | Events | Annual % | HR (95% CI)*      | <i>p</i> -value <sup>†</sup> | HR (95% CI)*      | <i>p</i> -value <sup>†</sup> |
| Overall                     | 83736                        | 23954  | 2.72     | 1.07 (1.05, 1.09) |                              | 1.03 (1.00, 1.05) |                              |
| Age                         |                              |        |          |                   | 0.008 <sup>†</sup>           |                   | 0.10 <sup>†</sup>            |
| 50-59                       | 24350                        | 3555   | 1.82     | 1.07 (1.02, 1.12) |                              | 1.11 (1.05, 1.17) |                              |
| 60-69                       | 39930                        | 12093  | 2.57     | 1.10 (1.07, 1.13) |                              | 1.00 (0.94, 1.04) |                              |
| 70-79                       | 19456                        | 8306   | 3.88     | 1.01 (0.97, 1.04) |                              | 1.02 (0.98, 1.06) |                              |
| Race/Ethnicity <sup>§</sup> |                              |        |          |                   | <0.001                       |                   | 0.06                         |
| Non-Hispanic White          | 72214                        | 21608  | 2.82     | 1.07 (1.05, 1.09) |                              | 1.02 (0.99, 1.04) |                              |
| Non-Hispanic Black          | 5934                         | 1197   | 2.11     | 1.04 (0.97, 1.12) |                              | 1.13 (1.03, 1.23) |                              |
| Hispanic                    | 2411                         | 458    | 2.04     | 0.98 (0.87, 1.11) |                              | 1.16 (1.00, 1.35) |                              |
| Non-Hispanic Asian          | 1524                         | 260    | 1.46     | 1.26 (1.04, 1.54) |                              | 0.94 (0.75, 1.18) |                              |
| Hypertension                |                              |        |          |                   | 0.88                         |                   | 0.46                         |
| No                          | 59050                        | 15062  | 2.40     | 1.07 (1.04, 1.09) |                              | 1.03 (1.00, 1.07) |                              |

|                                      |       |       |      |                   |                   |
|--------------------------------------|-------|-------|------|-------------------|-------------------|
| Yes                                  | 24686 | 8892  | 3.52 | 1.07 (1.04, 1.10) | 1.02 (0.98, 1.05) |
| Treated Diabetes                     |       |       |      | 0.19              | 0.13              |
| No                                   | 80416 | 22704 | 2.67 | 1.07 (1.05, 1.09) | 1.02 (1.00, 1.05) |
| Yes                                  | 3320  | 1250  | 4.25 | 1.02 (0.94, 1.10) | 1.10 (1.00, 1.21) |
| Coronary artery disease <sup>1</sup> |       |       |      | 0.10              | 0.29              |
| No                                   | 81487 | 22908 | 2.66 | 1.07 (1.05, 1.09) | 1.02 (1.00, 1.05) |
| Yes                                  | 2249  | 1046  | 5.33 | 0.99 (0.91, 1.08) | 1.09 (0.98, 1.21) |
| Smoking                              |       |       |      | 0.14              | 0.01              |
| Never                                | 42736 | 11988 | 2.60 | 1.07 (1.05, 1.10) | 1.00 (0.97, 1.04) |
| Past                                 | 35476 | 10472 | 2.83 | 1.05 (1.02, 1.08) | 1.07 (1.03, 1.11) |
| Current                              | 5524  | 1494  | 3.04 | 1.13 (1.06, 1.21) | 0.96 (0.88, 1.05) |
| Alcohol, drinks/wk                   |       |       |      | 0.86              | 0.07              |
| 0                                    | 34272 | 10034 | 2.85 | 1.07 (1.04, 1.11) | 1.06 (1.02, 1.09) |
| >0 - <7                              | 39229 | 10728 | 2.57 | 1.06 (1.03, 1.10) | 1.00 (0.97, 1.04) |

|                                    |       |       |      |                   |                   |
|------------------------------------|-------|-------|------|-------------------|-------------------|
| ≥7                                 | 10235 | 3192  | 2.90 | 1.06 (1.01, 1.12) | 1.01 (0.95, 1.08) |
| CHARGE-AF 5 year risk <sup>#</sup> |       |       |      | 0.86              | 0.02              |
| <5%                                | 74127 | 19245 | 2.45 | 1.06 (1.04, 1.09) | 1.05 (1.02, 1.07) |
| ≥5%                                | 9609  | 4709  | 5.03 | 1.07 (1.02, 1.13) | 0.97 (0.92, 1.03) |

Subgroup hazard ratios (HRs), 95% confidence intervals (CIs), and interaction *p*-values are from a proportional hazards regression with atrial fibrillation (AF) as a function of the Stress Cluster, Stress Cluster by subgroup interaction, the Strain Cluster, and Strain Cluster by subgroup interaction, stratified by Women's Health Initiative (WHI) component (clinical trial/observational study), and adjusted for age, ethnicity, race, education, waist-hip ratio, physical activity, smoking, alcohol, hypertension, diabetes, heart failure, and myocardial infarction

\*HRs and corresponding CIs are for an increase of 1 point in the given cluster score

†*p*-value is for the subgroup by cluster interaction

‡Cluster by age interaction terms from a separate model with linear trend over age groups, the Stress Cluster, Stress Cluster by linear trend over age groups interaction, the Strain Cluster, and Strain Cluster by linear trend over age groups interaction

§White = Non-Hispanic White; Black = Non-Hispanic Black; Hispanic = Hispanic, all races; Asian = Non-Hispanic Asian

‡History of coronary artery disease (CAD) subgroup model is not adjusted for history of myocardial infarction

#CHARGE-AF (a validated score<sup>24-27</sup> encompassing traditional AF risk factors to predict incident AF within 5 years in diverse patient populations) subgroup model is stratified by WHI component (clinical trial/observational study) and adjusted for ethnicity, race, education, waist-hip ratio, physical activity, and alcohol
